# Supplementary material
Source: publisher figshare collection journal article supplement (https://karger.figshare.com/ndownloader/files/35902901)
Supplement: Supplementary file 1 [file 35902901]

**Supplementary Figure 1:** Kaplan-Meier curves for overall survival by molecular subtype in IBC from the date of diagnosis.
